# Supplementary material for: Vertical heterostructure of graphite–MoS2 for gas sensing
Source: Royal Society of Chemistry journal article supplement (doi:10.1039/d4nh00049h), 2024-01-01
Supplement: d4nh00049h1.pdf [file d4nh00049h1.pdf]

## Vertical heterostructure of graphite-MoS<sub>2</sub> for gas sensing

M. Tripathi<sup>1\*#</sup>, G. Deokar<sup>2#</sup>, J. Casanova-Chafer<sup>3</sup>, J. Jin<sup>2</sup>, A. Sierra-Castillo<sup>4</sup>, S. P. Ogilvie<sup>1</sup>, F. Lee<sup>1, 5</sup>, S. A. Iyengar<sup>6</sup>, A. Biswas<sup>6</sup>, E. Haye<sup>7</sup>, A. Genovese<sup>8</sup>, E. Llobet<sup>3</sup>, J- F Colomer<sup>4</sup>, I. Jurewicz<sup>9</sup>, V. V. Gadhamshetty<sup>\*10</sup>, P.M. Ajayan<sup>6</sup>, Udo Schwingenschlögl<sup>2</sup>, Pedro M. F. J. Costa<sup>2</sup>, A. B. Dalton<sup>1\*</sup>

<sup>1</sup> Department of Physics and Astronomy, University of Sussex, Brighton BN1 9RH, U.K.

<sup>2</sup> King Abdullah University of Science and Technology (KAUST), Physical Science and Engineering Division, Thuwal, 23955 - 6900, Saudi Arabia

<sup>3</sup> Universitat Rovira i Virgili, MINOS, Avda. Països Catalans, 26, 43007 Tarragona, Spain

<sup>4</sup> Research Group on Carbon Nanostructures (CARBONNAGE), University of Namur, 5000 Namur, Belgium.

<sup>5</sup> International Institute for Nanocomposites Manufacturing (IINM), WMG, University of Warwick, Coventry CV47AL, U.K.

<sup>6</sup> Department of Materials Science and NanoEngineering, Rice University, Houston, Texas 77005, United States.

<sup>7</sup> Laboratoire d'Analyse par Réactions Nucléaires (LARN), Namur Institute of Structured Matter (NISM), University of Namur, 61 Rue de Bruxelles, 5000 Namur, Belgium

<sup>8</sup> King Abdullah University of Science and Technology, Core Labs, Thuwal, 23955-6900, Saudi Arabia

<sup>9</sup> Department of Physics, Faculty of Engineering & Physical Sciences, University of Surrey, Guildford GU2 7XH, UK

<sup>10</sup> Department Civil and Environmental Engineering, South Dakota School of Mines and Technology, Rapid City, SD, 57701 USA

Supplementary Information

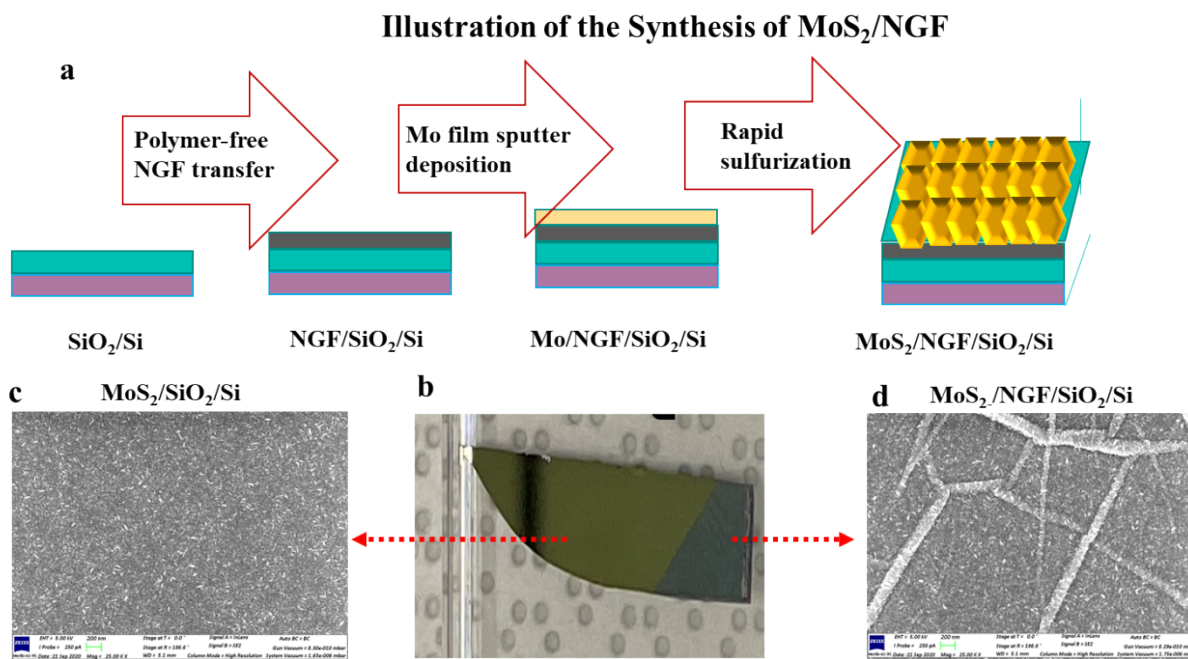

**Figure S1: Preparation of the hybrid structure.** Schematic view illustrating the different stages of formation of vertically aligned MoS<sub>2</sub> over nano-thick graphite surface. Initially, there is a polymer-free transfer of graphite film (NGF) over the silica substrate, followed by Mo sputtering and rapid sulfurization. (b) The optical image contrast of the MoS<sub>2</sub> sheet over Silica substrate and graphite are marked by arrows for distinction. (c) SEM micrography of MoS<sub>2</sub> granular sheet over silica. (d) SEM micrograph of MoS<sub>2</sub> granular sheet over wrinkled graphite layers.

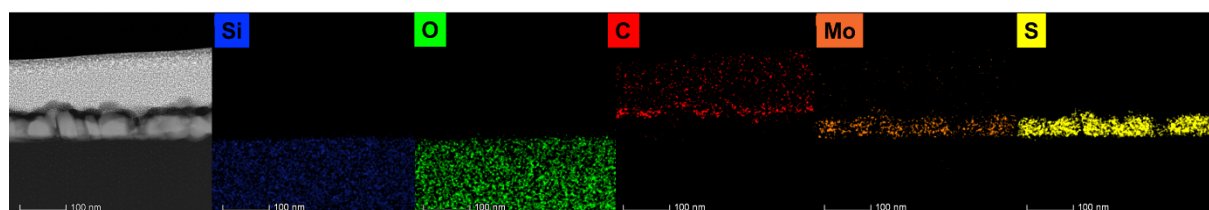

**Figure S2: Cross-section view of the hierarchy of the hetero-hybrid structure.** Left-hand side is SEM image of hierarchical architecture as (top) MoS<sub>2</sub>/NGF/SiO<sub>2</sub>/Si substrate. In the series of images from left to right-hand side, there is the elemental distribution in the Z-direction revealing the hierarchy of Si, O, C, Mo, S, respectively. It is worth noting that the elemental mapping of carbon is not from the NGF but a deposited polymeric layer during Energy-

dispersive X-ray (EDX) analysis. The NGF layers sandwiched between  $\text{SiO}_2$  and  $\text{MoS}_2$  is too thin to resolve in the present setup.

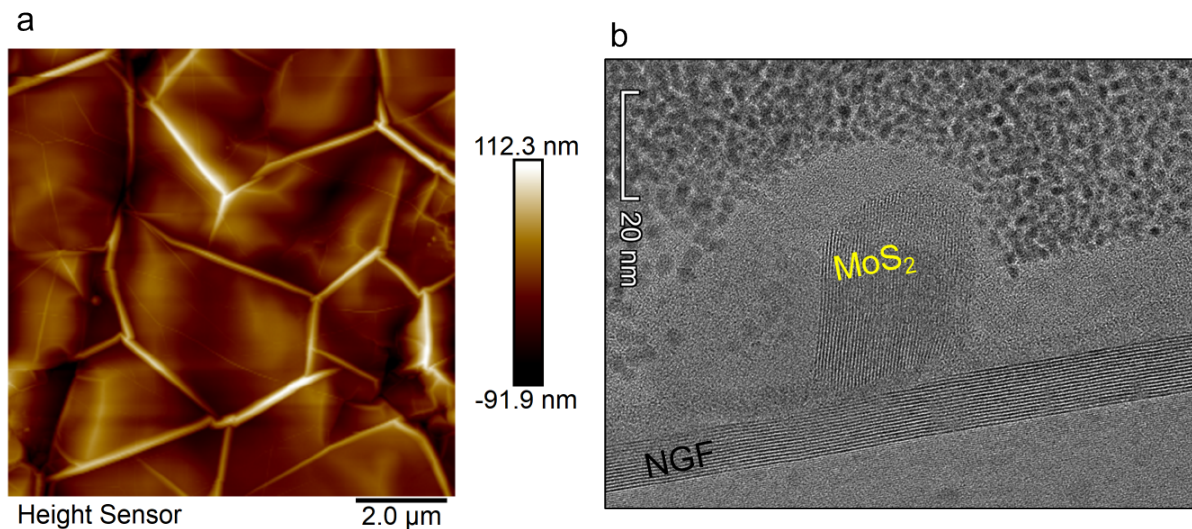

**Figure S3:** (a) AFM topography of NGF surface shows top-view landscape of graphene wrinkles, grain boundary (depression region) and basal plane. (b) High-resolution side view TEM image of NGF and  $\text{MoS}_2$  shows horizontal stacking of graphite sheets and vertically aligned  $\text{MoS}_2$ .

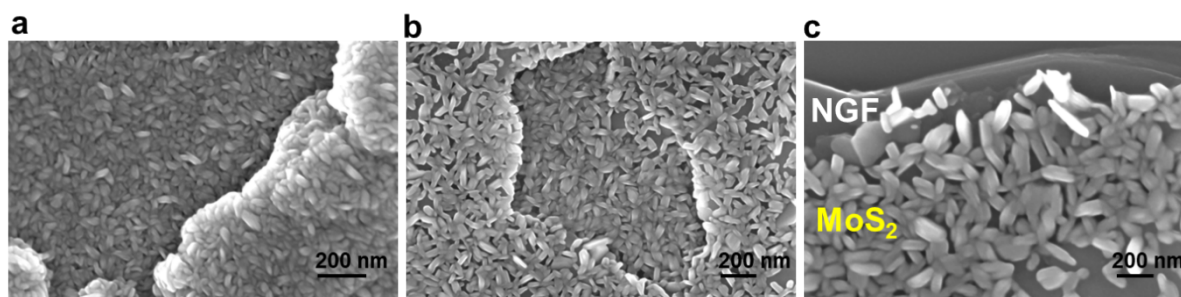

**Figure S4: Appearance of the hybrid heterostructure.** SEM micrographs of  $\text{MoS}_2$  granular flakes distribution over NGF at different locations (a) basal plane, (b) structural defect and (c) step-edge. The density of  $\text{MoS}_2$  varies with the size of Mo NPs, the size of 10 nm Mo film is relatively less populated than that of 20 nm Mo sulfurized film.

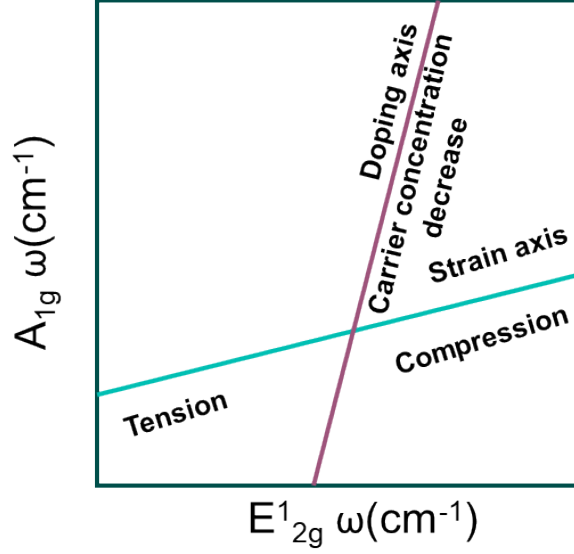

**Figure S5: Schematic correlation plot of MoS<sub>2</sub> deconvoluting strain and doping**

The Raman peak shifts  $\omega$  of  $E_{2g}^1$  and  $A_{1g}$  from the strain-free and doping-free positions can be related to the mechanical strain  $\varepsilon$  and the electrical doping  $n$  by a linear transformation, *i.e.*,

$$\begin{pmatrix} \omega_{E_{2g}^1} \\ \omega_{A_{1g}} \end{pmatrix} = \begin{pmatrix} -2\gamma_{E_{2g}^1} & k_{E_{2g}^1} \\ -2\gamma_{A_{1g}} & k_{A_{1g}} \end{pmatrix} \begin{pmatrix} \varepsilon \\ n \end{pmatrix}$$

where  $\gamma_{E_{2g}^1} = 0.86$  and  $\gamma_{A_{1g}} = 0.15$  are the Grüneisen parameters, while  $k_{E_{2g}^1} = -0.33 \times 10^{-13} \text{ cm}^{-1}$  and  $k_{A_{1g}} = -2.22 \times 10^{-13} \text{ cm}^{-1}$  are the doping shift rates. With this linear transformation, the strain and doping axes, as well as iso-strain and iso-doping contours can be constructed. The strain and doping can then be evaluated by projecting the peak positions onto the strain and doping axes.

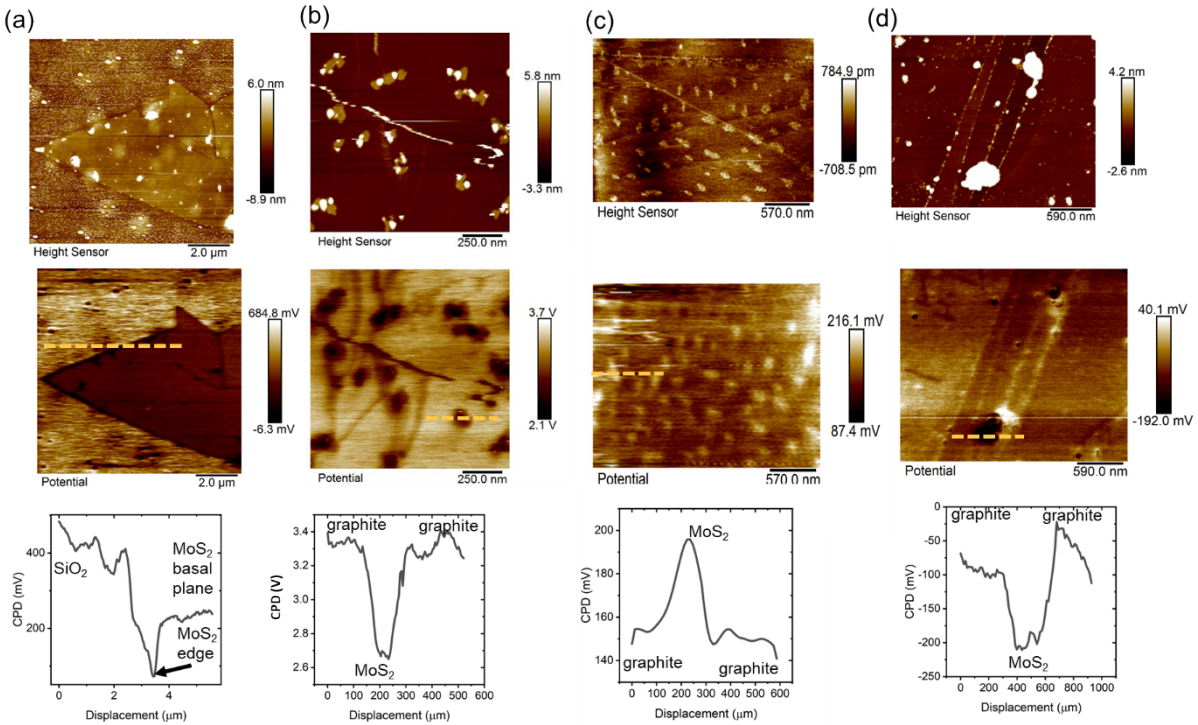

**Figure S6: Surface potential map of MoS<sub>2</sub> and vertical heterostructure of MoS<sub>2</sub> over graphite.** (a) Surface potential map of an MoS<sub>2</sub> over silica substrate. The surface potential reveals the contrast in contact potential difference (CPD, mV/V), indicating the distribution in carrier concentration. The brightest region represents the p-doped region (silica substrate), and the dark region represents the electron-rich region. Here, the edges of MoS<sub>2</sub> reveal the higher electron concentration, indicating a drop in the CPD values confirmed by the average line profile. (b) The surface potential map of MoS<sub>2</sub> over graphite flakes shows higher electron concentration in MoS<sub>2</sub>, indicated through dark colour in the CPD map and a decrease in the surface potential profile. (c) Exposure of the MoS<sub>2</sub>-graphite heterostructure to nitronium ions shows p-doping of MoS<sub>2</sub>, as indicated by the increase in the CPD values. (d) Exposure of the MoS<sub>2</sub>-graphite heterostructure to ammonium ions shows n-type doping in the MoS<sub>2</sub>, as there is the drop in the CPD values.



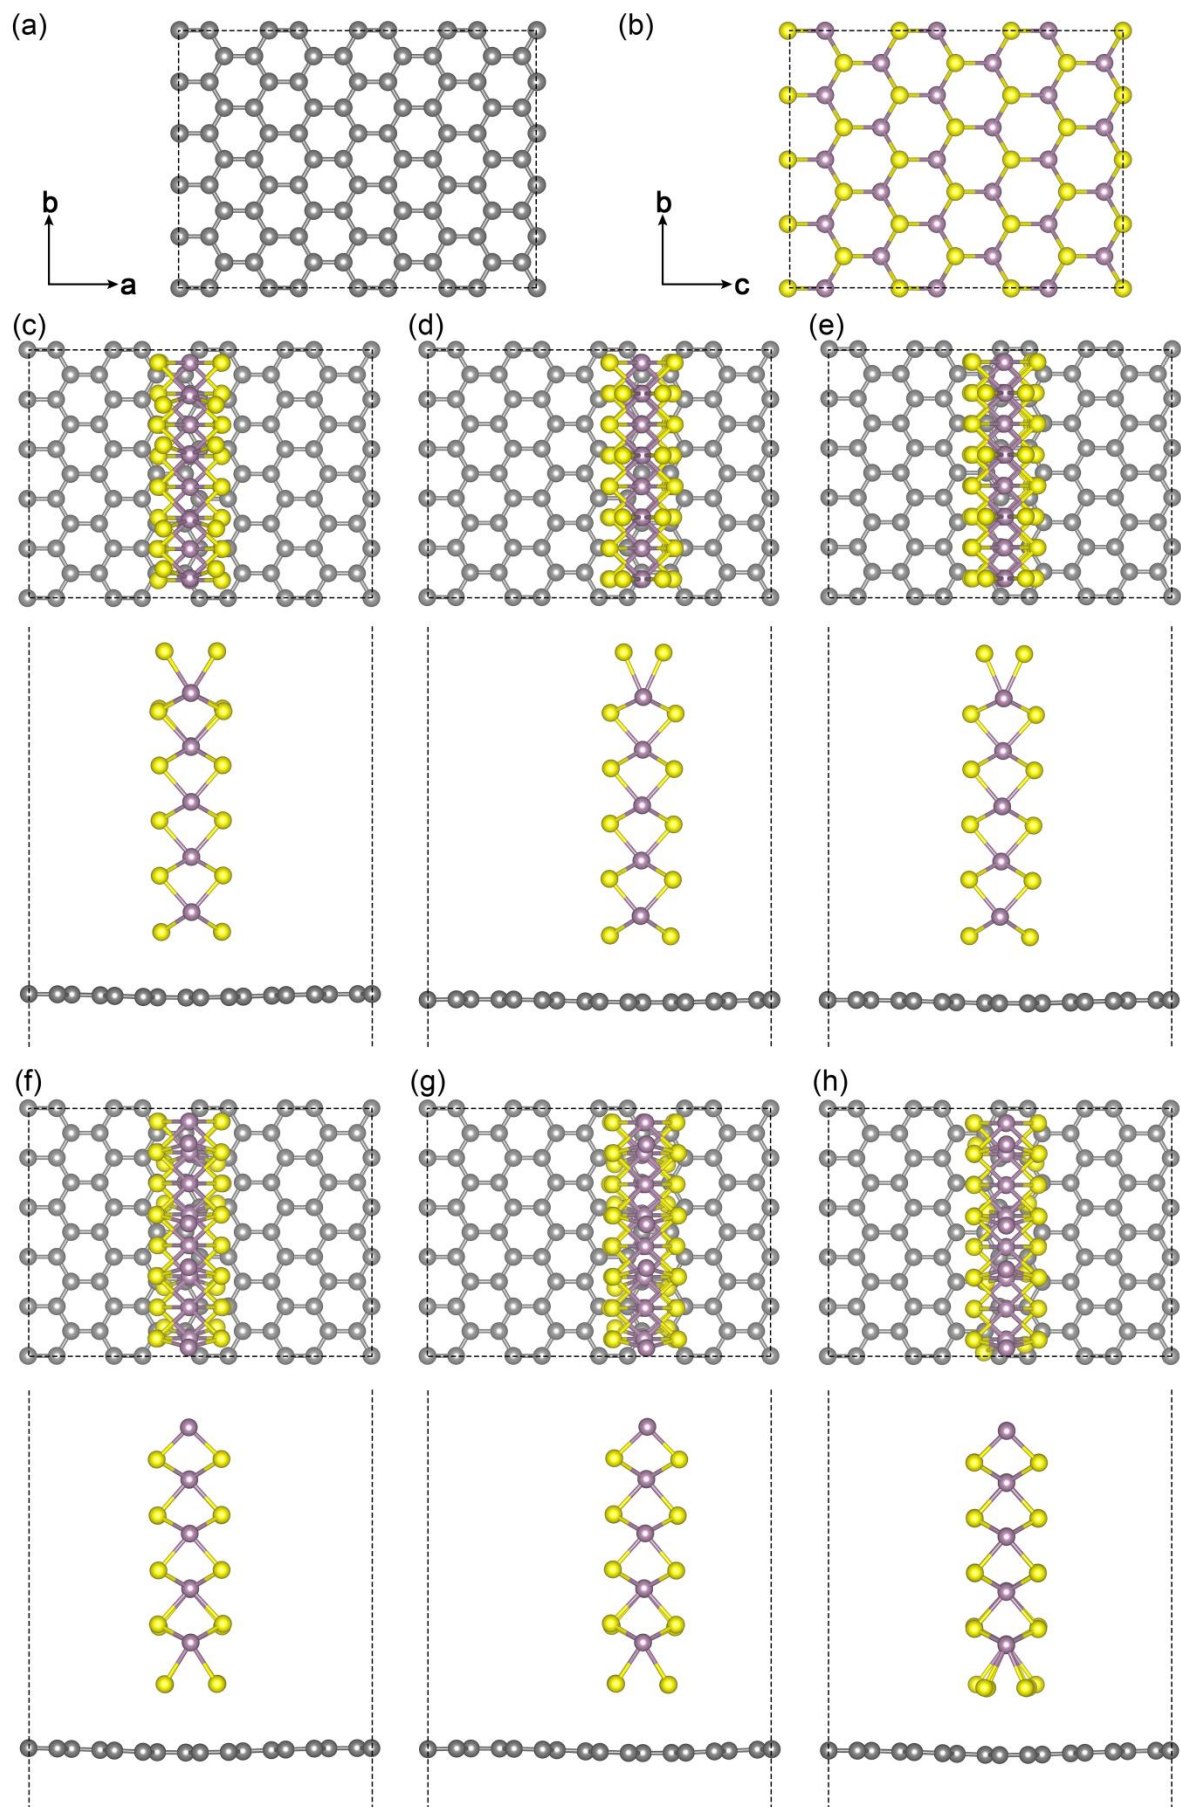

**Figure S7: Density functional theory simulations.** (a, b) Top views of the graphene and MoS<sub>2</sub> supercells. Optimized structures of the stacking configurations (c) AB, (d) AB1, and (e) AB2 of the S-terminated MoS<sub>2</sub> on graphene. Optimized structures of the stacking configurations (f) AB, (g) AB1 and (h) AB2 of the Mo-terminated MoS<sub>2</sub> on graphene.

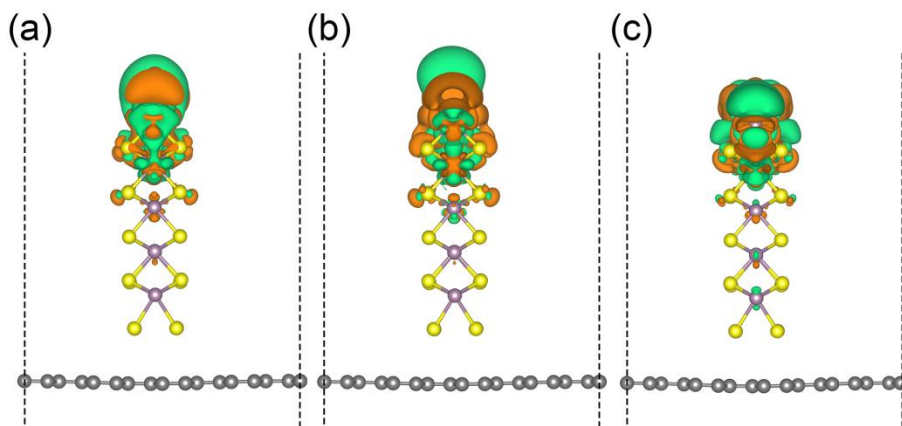

**Figure S8: Charge transfer.** Side views of the charge redistributions between the graphene/MoS<sub>2</sub> hybrid structure with Mo-termination (towards the analyte molecules) and (c) H<sub>2</sub>O, (d) NH<sub>3</sub>, and (e) NO<sub>2</sub>. Green and orange isosurfaces (isovalue: 0.001 electrons/Å<sup>3</sup>) represent charge depletion and accumulation, respectively. The gray, yellow, purple, white, red, and blue spheres represent the C, S, Mo, H, O, and N atoms, respectively.

**Table S1:** Adsorption energies ( $E_a$ ) of the analyte molecules and charge transfer ( $\Delta q$ ) between the graphene/MoS<sub>2</sub> hybrid structure and analyte molecules. Positive (negative)  $\Delta q$  represents charge transfer from the graphene/MoS<sub>2</sub> hybrid structure to the analyte molecules (from the analyte molecules to the graphene/MoS<sub>2</sub> hybrid structure).

|                | H <sub>2</sub> O |            | NH <sub>3</sub> |            | NO <sub>2</sub> |            |
|----------------|------------------|------------|-----------------|------------|-----------------|------------|
|                | $E_a$            | $\Delta q$ | $E_a$           | $\Delta q$ | $E_a$           | $\Delta q$ |
| S-termination  | -0.09            | 0.01       | -0.11           | -0.01      | -0.13           | 0.21       |
| Mo-termination | -1.20            | 0.10       | -1.55           | -0.05      | -4.42           | 1.02       |

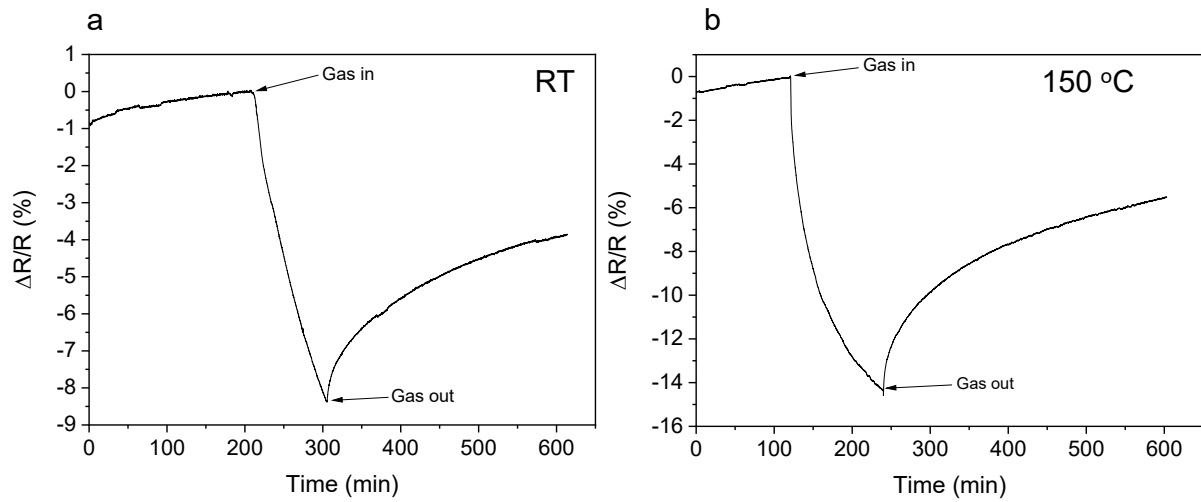

**Figure S9:** Recovery tests when detecting  $\text{NO}_2$ , left side (room temperature) and right (150 °C)

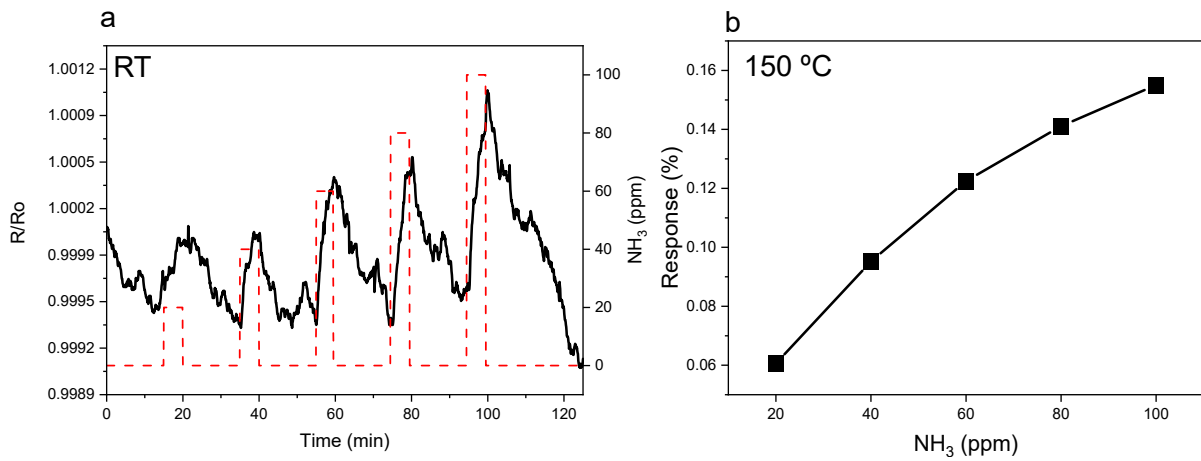

**Figure S10:** Increment in the response from the hybrid sensor during  $\text{NH}_3$  exposure for different concentrations at elevated temperatures.



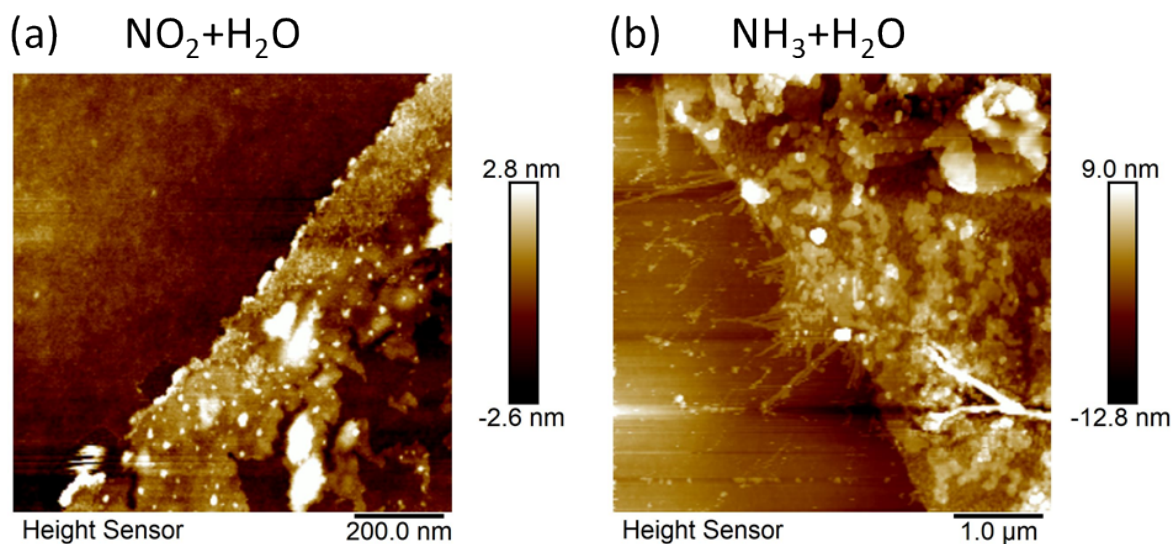

**Figure S11: Morphology of exposed MoS<sub>2</sub>.** (a) Topography of MoS<sub>2</sub> treated with (a) aqueous solution of NO<sub>2</sub> and (b) NH<sub>3</sub> as NH<sub>4</sub>OH. The topography was taken after drying of the solution and accumulation of salts were monitored. The ammonium salts are distributed uniformly over the basal plane of MoS<sub>2</sub>, while salts of the nitro group mostly appear at the edge of MoS<sub>2</sub>.

**Table S2.** Performance comparison in the detection of NO<sub>2</sub> with previously reported sensors.

| Nanomaterial               | T° (C)              | Carrier gas | Sensitivity coefficient (response/ppm) | RH study | Flow rate (sccm) | Reference                     |
|----------------------------|---------------------|-------------|----------------------------------------|----------|------------------|-------------------------------|
| MoS <sub>2</sub> /Graphite | 150                 | Air         | 1.67                                   | Yes      | 100              | Current work                  |
| UFew-Layer Graphene (FLG)  | 100                 | Air         | 0.83                                   | Yes      | 100              | Deokar et al. <sup>1</sup>    |
| MoS <sub>2</sub> /VACNT    | RT/100 <sup>a</sup> | Air         | 0.64                                   | Yes      | 100              | Deokar et al. <sup>2</sup>    |
| MoS <sub>2</sub> /Graphene | RT (UV)             | Air         | 0.08                                   | No       | NA               | Kumar et al. <sup>3</sup>     |
| MoS <sub>2</sub> /rGO      | 60                  | Air         | 0.02                                   | Yes      | 500              | Zhou et al. <sup>4</sup>      |
| MoS <sub>2</sub> -rGO/CNT  | RT (UV)             | Air         | 0.017                                  | No       | NA               | Ghasemi <sup>5</sup>          |
| MoS <sub>2</sub> /rGO      | RT                  | Nitrogen    | 0.004                                  | No       | 1000             | Mukherjee et al. <sup>6</sup> |

|                             |     |     |     |     |     |                               |
|-----------------------------|-----|-----|-----|-----|-----|-------------------------------|
| <b>MoS<sub>2</sub>/rGO</b>  | 50  | Air | 0.6 | No  | 175 | Kumar et al. <sup>7</sup>     |
| <b>MoS<sub>2</sub>/GA</b>   | 200 | Air | 3.4 | No  | 300 | Long et al. <sup>8</sup>      |
| <b>Pure MoS<sub>2</sub></b> | 100 | Air | 1.4 | Yes | 100 | Annanouch et al. <sup>9</sup> |

### Reference:

1. G. Deokar, J. Casanova-Cháfer, N. S. Rajput, C. Aubry, E. Llobet, M. Jouiad and P. M. F. J. Costa, *Sensors and Actuators B: Chemical*, 2020, **305**, 127458.
2. G. Deokar, P. Vancso, R. Arenal, F. Ravaux, J. Casanova-Cháfer, E. Llobet, A. Makarova, D. Vyalikh, C. Struzzi and P. Lambin, *Advanced Materials Interfaces*, 2017, **4**, 1700801.
3. R. Kumar, N. Goel and M. Kumar, *ACS sensors*, 2017, **2**, 1744-1752.
4. Y. Zhou, G. Liu, X. Zhu and Y. Guo, *Sensors and Actuators B: Chemical*, 2017, **251**, 280-290.
5. F. Ghasemi, *Scientific Reports*, 2020, **10**, 11306.
6. A. Mukherjee, L. R. Jaidev, K. Chatterjee and A. Misra, *Nano express*, 2020, **1**, 010003.
7. R. Kumar, N. Goel, A. V. Agrawal, R. Raliya, S. Rajamani, G. Gupta, P. Biswas, M. Kumar and M. Kumar, *IEEE Sensors Journal*, 2019, **19**, 10214-10220.
8. H. Long, A. Harley-Trochimczyk, T. Pham, Z. Tang, T. Shi, A. Zettl, C. Carraro, M. A. Worsley and R. Maboudian, *Advanced Functional Materials*, 2016, **26**, 5158-5165.
9. F. E. Annanouch, A. Alagh, P. Umek, J. Casanova-Chafer, C. Bittencourt and E. Llobet, *Journal of Materials Chemistry C*, 2022, **10**, 11027-11039.
